# Supplementary material
Source: Springer Nature journal article supplement (https://www.springermedizin.de/resource/supplementary/12890_2014_648_MOESM1_ESM.pdf/9505502)
Supplement: MOESM1 [file 9505502]

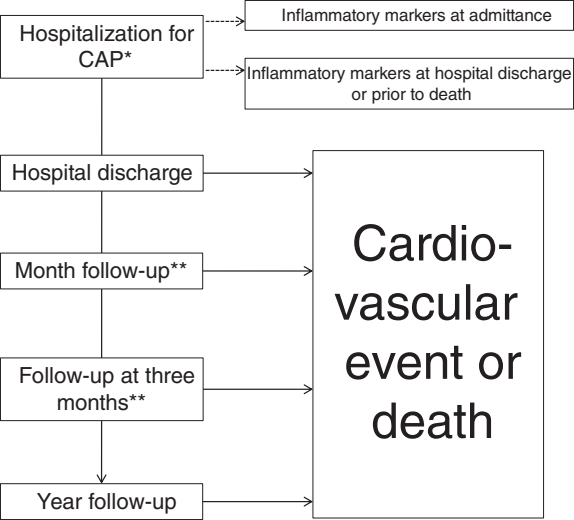

Hospitalization for  
CAP\*

Inflammatory markers at admittance

Inflammatory markers at hospital discharge  
or prior to death

Hospital discharge

Month follow-up\*\*

Follow-up at three  
months\*\*

Year follow-up

Cardio-  
vascular  
event or  
death
